# Supplementary material
Source: PubMed Central journal article supplement (PMC6596421)

# Supplementary Figure 1

A.

| Gene set name                                | Wouters et al. (GSE14468) |            | Tomasson et al. (GSE10358) |             |
|----------------------------------------------|---------------------------|------------|----------------------------|-------------|
|                                              | Odds Ratio                | P value    | Odds Ratio                 | P value     |
| CHIR99021_vs_ctl_GSE43421                    | 1.97                      | 0.001201   | 9.30                       | 4.568E-13   |
| STEGMAIER_GSK3A_and_GSK3B.KD_vs_ctl_GSE35200 | 13.16                     | < 2.2e-16  | 19.56                      | < 2.2e-16   |
| STEGMAIER_GSK3A.KD_vs_ctl_GSE35200           | 12.58                     | < 2.2e-16  | 13.19                      | < 2.2e-16   |
| STEGMAIER_GSK3B.KD_vs_ctl_GSE35200           | 20.93                     | < 2.2e-16  | 33.86                      | < 2.2e-16   |
| WANG_RESPONSE_TO_GSK3_INHIBITOR_SB216763     | 2.68                      | 0.00001588 | 3.74                       | 0.000007176 |

B.

| Patient | Age | Sex | Diagnosis                              | FLT3 | NPM1 | IDH1/2 | Cytogenetics                                          |
|---------|-----|-----|----------------------------------------|------|------|--------|-------------------------------------------------------|
| 1       | 33  | M   | <i>De novo</i> AML, primary refractory | WT   | WT   | WT     | 46,XY,inv(3)(q21q26)[3]/45,idem,-7[16]/46,XY[1]       |
| 2       | 20  | F   | <i>De novo</i> AML, primary refractory | WT   | WT   | n/a    | 45,XX,t(3;12)(q26;p13),?del(5)(q3?2),-7[24]           |
| 3       | 49  | M   | Secondary AML (prior CML)              | n/a  | n/a  | n/a    | 45,XY,inv(3)(q21q26),-7,t(9;22)(q34;q11)[19]/46,XY[1] |

C.

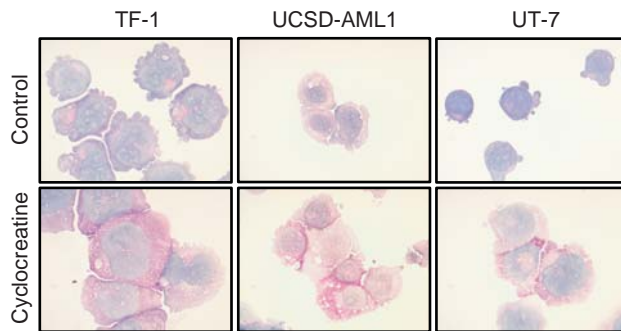

D.

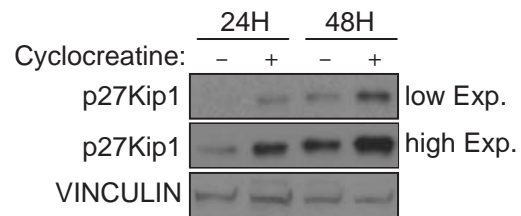

Supplement: NIHMS1034586-supplement-Supplemental_Figures.pdf [file NIHMS1034586-supplement-Supplemental_Figures.pdf]
